# Supplementary material for: Investigating the Effect of Gaze Cues and Emotional Expressions on the Affective Evaluations of Unfamiliar Faces
Source: PLoS One. 2016 Sep 28;11(9):e0162695. doi: 10.1371/journal.pone.0162695 (PMC5040344; doi:10.1371/journal.pone.0162695)
Supplement: S3 Experiment 3 Dataset — (XLSX) [file pone.0162695.s003.xlsx]

## Sheet: Sheet1
Participant	RT PCS	RT PUS	RT NCS	RT NUS	RT PCM	RT PUM	RT NCM	RT NUM	Rate PCS	Rate PUS	Rate NCS	Rate NUS	Rate PCM	Rate PUM	Rate NCM	Rate NUM
1	0.5668	0.5748	0.5455	0.5517	0.5799	0.5733	0.5888	0.5958	5.63	5.13	4.5	6.13	5.38	4.5	5.75	5.13
2	0.4993	0.6354	0.5017	0.6248	0.5605	0.6314	0.5389	0.6153	6.88	5.63	4.5	4.13	5.75	4.38	5.25	5.88
3	0.604	0.6324	0.5759	0.5946	0.6142	0.6105	0.6215	0.6045	5.25	5.75	4.25	5.5	5.63	6.25	5.63	4.75
4	0.6226	0.606	0.6262	0.6332	0.6309	0.655	0.6162	0.6456	4.13	5.25	4.25	4.38	3.63	4.38	4	3.5
5	0.6588	0.7963	0.7636	0.6963	0.7773	0.7841	0.6955	0.8003	5.5	6.88	4.5	5	6.13	7	5.63	5.13
6	0.5592	0.6616	0.6265	0.6672	0.6724	0.5761	0.6031	0.6687	6	7.38	6.25	7	6.75	6	6.75	6.75
7	0.9498	0.9195	0.875	0.8632	0.8451	1.0442	0.8219	0.9123	5.75	4.75	6	5.38	6.13	5.88	5	5
8	0.7328	0.6976	0.7068	0.8314	0.7162	0.7313	0.6522	0.7859	5.63	3.88	6.13	5.5	6.63	6.13	4.5	6.75
9	0.7068	0.7379	0.6589	0.7045	0.6583	0.7024	0.6955	0.7641	4.63	5.5	5	5.88	4.75	4	4.88	5.5
10	0.5432	0.5183	0.4955	0.6056	0.4916	0.5208	0.5455	0.5207	5.25	5	4.63	4.75	4.88	4.88	5.13	4.88
11	0.5043	0.5236	0.4681	0.5612	0.462	0.5366	0.431	0.5381	3	2.75	2.5	2.75	3.25	3.25	2.75	3.13
12	0.6142	0.816	0.6283	0.7011	0.5848	0.6943	0.6385	0.7779	4.13	6	7.88	6.75	6	7.25	7.38	6.5
13	0.6147	0.5527	0.5223	0.6378	0.5582	0.5964	0.5557	0.5883	4.75	4.88	5.38	4.75	4.5	4.75	5.75	5.5
14	0.5459	0.6163	0.6169	0.6401	0.5173	0.7377	0.4867	0.6015	4.38	4.25	4	5.5	5.25	5.25	4.38	5.5
15	0.5498	0.6174	0.5931	0.5975	0.5948	0.6287	0.6464	0.6254	6.5	6	5.75	6.5	6.25	6.5	5.63	6.5
16	0.4989	0.5265	0.497	0.6348	0.4763	0.5796	0.5072	0.5153	3.88	3.75	2.75	3.13	2.13	5	2.75	4.13
17	1.1204	0.7821	0.7594	0.6515	0.7048	0.7157	0.7941	0.8422	5.63	5.13	5.75	5.25	6.25	6.13	5.38	5.63
18	0.7005	0.7603	0.8417	0.9678	0.7891	0.983	0.6852	0.876	4.75	4.88	4.38	4.25	4.75	4.5	4	4.75
19	0.5164	0.5818	0.5796	0.6	0.5744	0.6072	0.6048	0.5536	4.5	6.5	4.88	5	6.75	6.38	4.38	5.63
20	0.4836	0.5681	0.5023	0.503	0.468	0.5352	0.5171	0.5074	7	4.63	5.75	4.38	6.63	5.13	7.38	5.5
21	0.5923	0.6232	0.6485	0.686	0.5988	0.6587	0.5962	0.6542	6.5	5.88	6.13	5	5.63	6.25	6.25	5.63
22	0.6322	0.6185	0.5908	0.6513	0.6782	0.658	0.6009	0.6507	6.25	5	6.63	5.75	5.13	6.75	4.5	6.75
23	0.572	0.6134	0.5143	0.5579	0.5468	0.5841	0.5562	0.5957	5.88	5.75	5.75	6	5.75	5.63	6.38	5.75
24	0.6999	0.7776	0.7309	0.7063	0.7032	0.6859	0.6498	0.697	6.38	5.88	6.25	6	6	6.13	5.63	6.25
25	0.6095	0.6008	0.5388	0.5538	0.5321	0.5514	0.5469	0.5926	4	4.88	5.5	4.13	5	6.63	5.5	5.25
26	0.6278	0.6682	0.6624	0.7254	0.6356	0.7535	0.6156	0.6964	4.38	3.75	6.75	4.25	4	5	4.88	3.25
27	0.5959	0.6911	0.643	0.6555	0.6405	0.6428	0.5931	0.6579	5.63	5.13	5.38	5	5.38	5.25	5	5.13
28	0.6139	0.6421	0.6111	0.6523	0.559	0.6928	0.5595	0.5569	6.13	5.63	3.5	4.38	5.88	5.63	5.38	4.5
29	0.6166	0.6735	0.6887	0.645	0.6272	0.6679	0.5803	0.7159	6.5	6.38	6.38	6.25	6.25	6.13	6	5.75
30	0.5459	0.5738	0.5158	0.5823	0.5453	0.5567	0.514	0.575	5	4.88	4.75	5	5.13	6.13	5.75	4.88
31	0.568	0.5267	0.5715	0.6017	0.5657	0.5296	0.5908	0.622	4.38	5.25	4.5	5	5.13	4.88	3.5	5.13
32	0.7841	0.8864	0.8248	0.85	0.8184	0.7834	0.7407	0.896	5.63	4.5	4.88	4.75	5.5	5.25	5	4.63
33	0.8314	0.9377	0.9049	0.7397	1.0647	1.0269	0.7961	0.9887	4.25	4.38	4.88	5	5.25	4.5	4.38	3.5
34	0.6256	0.6695	0.6478	0.6605	0.6661	0.6696	0.6375	0.699	4.88	5.13	4.88	5.38	4.5	5.25	4.88	5.5
35	1.0186	1.0108	0.9191	0.9769	0.9629	0.9567	0.9009	0.917	5.75	6.63	6.13	5	6.25	6.13	5.5	5.63
36	0.6214	0.6406	0.6207	0.6474	0.6057	0.6146	0.5891	0.6384	4.13	4.88	3.25	2.63	4.75	4.5	3.88	2.25
37	0.5612	0.5172	0.5508	0.5276	0.5525	0.507	0.5542	0.5702	4.13	5.75	4.38	5.13	4.25	3.5	4	4.25
38	0.5621	0.6331	0.5372	0.5431	0.5917	0.6185	0.6025	0.603	5.13	5.25	4.38	4.63	5	4.25	5.25	4.63
39	0.6552	0.6019	0.6524	0.5977	0.5476	0.6809	0.5727	0.6418	6.75	5.25	5.75	5.25	5	5.88	8.25	4.5
40	0.5238	0.538	0.5372	0.5503	0.5336	0.5603	0.5211	0.5967	6.13	5.75	7.5	6	7	5.63	6.38	7
41	0.5917	0.6701	0.6587	0.6644	0.6425	0.7189	0.6438	0.6985	6.5	5.75	6.38	5	5.5	6.13	5	5.75
42	0.7896	0.8401	0.8226	1.0033	0.7549	0.7857	0.786	0.8635	5	5.13	3.88	4.88	4.75	4.75	5	6.25
43	0.6837	0.7941	0.8689	0.8366	0.7163	0.7779	0.7194	0.7909	5.38	5.5	5.13	5.38	5	4.5	5.25	5.13
44	0.7697	0.8283	0.7862	0.8267	0.8077	0.8954	0.7385	0.8118	5	6.13	5.75	4.63	5.38	3.38	4.25	3.88
45	0.8513	0.8871	0.7764	0.8883	0.7567	0.8942	0.922	0.933	4.63	4.63	5.13	4.13	5.13	5.25	4.38	4.5
46	0.4831	0.5953	0.4976	0.5681	0.4246	0.5746	0.4696	0.5775	6.25	3.88	5	4.13	7.13	5.13	4.63	4.88
47	0.4826	0.5516	0.4969	0.5719	0.5372	0.5011	0.5077	0.5365	5.13	6	5.25	4.63	6.63	6.13	6	6.63
48	0.7991	0.7171	0.7449	0.7964	0.8972	0.6995	0.7868	0.7796	6.88	5.75	6.88	6.5	7.5	6	6.5	5.38
RT = Reaction time data; Rate = Ratings data; P = Positive cue face(s); N = negative cue face(s); C = Target cued by cue face(s); U = Target not cued by cue face(s); S = Single cue face; M = Multiple cue faces.
