# Supplementary material for: Investigating the Effect of Gaze Cues and Emotional Expressions on the Affective Evaluations of Unfamiliar Faces
Source: PLoS One. 2016 Sep 28;11(9):e0162695. doi: 10.1371/journal.pone.0162695 (PMC5040344; doi:10.1371/journal.pone.0162695)
Supplement: S4 Experiment 4 Dataset — (XLSX) [file pone.0162695.s004.xlsx]

## Sheet: Sheet1
Participant	RT PCS	RT PUS	RT NCS	RT NUS	RT PCM	RT PUM	RT NCM	RT NUM	Rate PCS	Rate PUS	Rate NCS	Rate NUS	Rate PCM	Rate PUM	Rate NCM	Rate NUM
1	0.7382	0.7171	0.6859	0.7936	0.6891	0.7372	0.6777	0.7721	3.25	3.375	4.25	3.75	4.5	4.875	4	3.625
2	0.6136	0.6321	0.587	0.6382	0.5237	0.5513	0.5523	0.5986	4.375	4	4.625	5.25	5.125	4	4.25	4.875
3	0.5652	0.4934	0.6207	0.6243	0.5265	0.5752	0.5577	0.4993	1.875	2.25	1.375	2.375	1.875	1.75	1.125	2.125
4	0.6792	0.7535	0.6951	0.7804	0.8248	0.676	0.8044	0.7787	7.125	5.5	6	6.75	6	5.875	5.5	5.625
5	0.5135	0.5095	0.5038	0.6284	0.539	0.5089	0.5193	0.5053	4.25	5.75	6	4.625	5.125	4.625	4.75	5
6	0.5859	0.588	0.5023	0.6051	0.5125	0.5833	0.5346	0.5683	6	5.5	6	5.5	5.625	5.625	5.75	5
7	0.546	0.5743	0.5575	0.5084	0.5791	0.5504	0.462	0.5601	4.125	3.75	3.375	3.75	4.25	3.875	3.75	3.625
8	0.417	0.4716	0.4424	0.497	0.4334	0.4699	0.3967	0.5125	6.125	6	6	5.625	5.625	5.875	5.75	5.75
9	0.5168	0.5365	0.4866	0.5517	0.5706	0.5598	0.5162	0.5333	5	4.625	5	4.875	5.25	4.875	5.125	4.625
10	0.5272	0.5824	0.5247	0.51	0.5281	0.5697	0.512	0.5642	2.25	1.375	1.625	1.875	1.125	1.25	1.25	1.375
11	0.7021	0.6159	0.6909	0.695	0.8302	0.6631	0.6371	0.6162	4.25	5.125	5.25	4.375	4.625	4.5	4.875	4.875
12	0.7424	0.6599	0.7456	0.6473	0.6532	0.6428	0.6893	0.693	4.5	6.125	5.25	4.875	4.25	4.75	5.375	5
13	0.8693	1.0754	0.7571	0.8251	0.8642	0.8249	0.9108	0.9526	6.125	4.5	4.25	3.625	5.625	5.875	4	4
14	0.5362	0.6105	0.5964	0.6233	0.525	0.5649	0.5302	0.5823	5.25	4	4.25	4.625	5	6	4.5	3.125
15	0.5491	0.5669	0.566	0.561	0.5331	0.556	0.5864	0.5678	3.875	4	4.625	4.5	4.375	4	4.375	4.875
16	0.56	0.6732	0.6032	0.6062	0.5712	0.6203	0.6324	0.5433	4.875	4.25	5.375	3.75	5.75	4.375	5.5	4.5
17	0.6511	0.6948	0.6048	0.6506	0.5821	0.6155	0.5883	0.6222	4	4.25	4.125	3	3.875	3.375	3.875	4
18	0.9686	0.9777	1.0523	1.0721	1.0091	1.0877	1.3745	1.0677	6.375	5.25	5.25	5.375	5.375	4.875	6.125	5.125
19	0.5038	0.4502	0.4907	0.4606	0.4596	0.4401	0.4858	0.4761	6.375	6	6.25	4.75	5.125	6	5.375	5.25
20	0.4673	0.5655	0.4879	0.5574	0.4829	0.4451	0.5434	0.5118	5.75	4.125	5.5	5.375	6	5.625	4.625	3.875
21	0.4809	0.5229	0.4902	0.4884	0.456	0.4833	0.4653	0.4824	7	6.375	5.875	6.125	7.375	6.75	6	7.125
22	0.5791	0.5682	0.5681	0.5618	0.5195	0.6716	0.5582	0.5656	5.5	6	5.125	5.125	5.125	5	5.625	4.75
23	0.5317	0.556	0.5364	0.5436	0.514	0.5857	0.5038	0.5397	5.75	5.75	5.875	5.375	6.25	6.125	5.875	6.375
24	0.7416	0.7573	0.6656	0.9174	0.5941	0.6177	0.7073	0.724	6.75	6.75	6.375	6.375	6.25	6.625	6.25	6.125
25	0.6991	0.6587	0.6781	0.6709	0.7257	0.6798	0.7125	0.6005	4.25	4.125	4	4.375	4.125	4	4.25	4.125
26	0.5034	0.4979	0.5087	0.5386	0.5448	0.4939	0.5035	0.5324	5.5	5	4.75	5.625	4.875	5.75	5.25	5
27	0.5415	0.5697	0.5693	0.6012	0.5208	0.5429	0.5431	0.548	4.875	6.25	4.875	6.25	5.625	5.375	4.625	5.25
28	0.6243	0.6552	0.6309	0.6878	0.5849	0.6742	0.6224	0.6651	4.75	4.75	4.375	4.25	3.5	5	4.125	4.625
29	0.6196	0.5683	0.5493	0.6346	0.5087	0.5547	0.5214	0.5816	6.375	7	7	6	6.625	6	6.125	7
30	0.6542	0.5778	0.6499	0.599	0.6167	0.6292	0.6161	0.6405	3	4.5	3.75	3.625	4.125	2.625	3.25	3.25
31	0.5851	0.6704	0.6328	0.6119	0.6865	0.6213	0.5713	0.6163	5.75	5.75	4.625	5.625	5.625	5.625	5	5
32	0.4592	0.5925	0.5493	0.5707	0.5893	0.514	0.5818	0.5605	6.125	5.625	4	4.75	5.875	5.125	4.625	4.75
33	0.5196	0.5494	0.584	0.5317	0.4856	0.5375	0.4928	0.5395	5.375	4.125	3.875	3.75	5.375	4.25	4.625	4.125
34	0.5842	0.6291	0.5672	0.5493	0.5795	0.5152	0.561	0.5966	3.875	4	3.75	3.625	3	3.125	3.25	4
35	0.7248	0.7615	0.7907	0.7039	0.7588	0.7696	0.733	0.7976	4.25	3.25	4	3.5	4.5	4	3.5	4.125
36	0.6474	0.6069	0.5851	0.6231	0.6052	0.6364	0.5714	0.6627	6.5	5.875	4.875	5.5	6	6.125	6.5	6
37	0.6102	0.6497	0.6138	0.6327	0.6292	0.6584	0.6098	0.6657	4	3.625	4.125	3.75	4.375	4.25	4.125	3.875
38	0.4923	0.5931	0.5896	0.514	0.538	0.5323	0.5598	0.5851	5	5	5.125	5.625	5	5.25	5.125	4.625
39	0.4964	0.474	0.4573	0.4691	0.4457	0.4462	0.4218	0.4855	5.625	4.625	5	6.125	5.25	5.75	4.875	5.25
40	0.527	0.5716	0.6751	0.5666	0.4819	0.6181	0.5413	0.5291	2.625	1.5	2.125	1.5	3.125	3.25	2.875	2.25
41	0.6012	0.6391	0.5584	0.6408	0.6849	0.6293	0.5749	0.6213	4.875	5.375	4.875	4.875	5.5	5.125	5	4.875
42	0.4402	0.552	0.448	0.4619	0.4872	0.446	0.4223	0.4888	6.125	5.5	4.625	5	5.25	5.125	5.75	5
43	0.8241	0.6468	0.6742	0.6364	0.6934	0.7278	0.7107	0.6391	5	4.75	5	5.125	5	4.875	4.75	5.25
44	0.4885	0.5472	0.5654	0.5798	0.4649	0.549	0.5018	0.5205	5.875	6.25	6.625	5.375	6.25	5.25	5.875	5.375
45	0.8001	0.9112	0.8883	0.9006	0.7574	0.7522	0.8265	0.7062	6.625	7.25	7.125	6.375	7.125	6.5	6.125	7.5
46	0.7734	0.709	0.7154	0.7238	0.6597	0.7503	0.7457	0.7277	2.625	3.875	3	4.5	3.5	4	2.75	4.125
47	0.4857	0.5435	0.5138	0.5675	0.5239	0.5414	0.4934	0.5667	6.5	5.5	5.875	6	6	5.875	6	5.75
48	0.6785	0.5927	0.6133	0.6052	0.5703	0.6631	0.597	0.5923	5.625	4.875	4.875	4.5	5.125	5.125	5.25	4.5
	RT = Reaction time data; Rate = Ratings data; P = Positive cue face(s); N = negative cue face(s); C = Target cued by cue face(s); U = Target not cued by cue face(s); S = Single cue face; M = Multiple cue faces.
